# Supplementary material for: Tanshinone I, a new EZH2 inhibitor restricts normal and malignant hematopoiesis through upregulation of MMP9 and ABCG2
Source: PubMed Central journal article supplement (PMC8171091; doi:10.7150/thno.53170), 2021-05-08
Supplement: thnov11p6891s1.pdf [file thnov11p6891s1.pdf]

**Figure S1. Toxicity and phenotypes under treatments of different Tanshinones in zebrafish.** (A) Survival rate analysis of zebrafish embryos treated by DMSO, Tan I, Tan IIA and Cpt at indicated concentrations. Treatments started at 12 hpf and statistics were done at day 3. (B) Fluorescent images of *Tg(fli1:EGFP)* transgenic zebrafish embryos treated with DMSO, Tan I, Tan IIA and Cpt at the indicated concentration. (C) Sudan Black staining of DMSO, Tan I, Tan IIA and Cpt at indicated concentration, the bottom is the statistical analysis. (D) Fluorescent images of *Tg(lyz:EGFP)* transgenic zebrafish embryos treated with DMSO, Tan I, Tan IIA and Cpt at the indicated concentration. All the treatments (B-D) started at 30hpf. Scale bars: 200  $\mu$ m.

**Figure S2. Treatments with Tanshinones have no effect on zebrafish primitive hematopoiesis.** WISH of *scl*, *gata1*, *hbae1* of embryos treated with DMSO, Tan I, Tan IIA and Cpt at the indicated concentration. All treatment started at 12 hpf and embryos were collected at the indicated stages. Scale bars: 200  $\mu$ m

**Figure S3. Validation of RNA-seq result. (A-B)** GSEA of the expressing profile of NB4 cells treated with DMSO or Tan I using an apoptosis-associated signature (A) and a myeloid cell differentiation-associated signature (B). (C) Real-time PCR analysis of the RNA expression level of *abcg2d*, *ezh2*, *mmp9*, *nqo1*, *pgd* and *pir* in zebrafish embryos treated with DMSO or Tan I 60  $\mu$ M. (D) The protein expression level of EZH2 in zebrafish embryos treated with DMSO or Tan I 60  $\mu$ M

**Figure S4. Histone methylation evaluation in Tan I treated zebrafish embryos.** The indicated histone H3 methylation levels of DMSO- or Tan I-treated embryos were measured by western blotting, total histone H3 was used as control. Numbers on the top of each lane represent different biological repeats.

**Figure S5. Tan I binds with a much higher affinity to zEZH2 than to hEED and hardly binds to zSUZ12 proteins and block PRC2-mediated methylation on H3K27me3 of HeLa core histones *in vitro*.** (A) SPR analysis of the binding between EZH2 and EPZ6438 at different concentrations. (B) SPR analysis of the binding between hEED and Tan I at different concentrations. (C) SPR analysis of the binding between zSUZ12a and Tan I at different concentrations. (D) SPR analysis of the binding between zSUZ12b and Tan I at different concentrations. (E) Comparison of the binding response in SPR analysis of EZH2-Tan I, zSUZ12a-Tan I and zSUZ12b-Tan I at different concentrations. (F) *In vitro* inhibition of PRC2 complex activities by Tan I. In detail, the indicated proteins (0.28  $\mu$ g of the PRC2 complex and 0.2  $\mu$ g of HeLa core histones) were mixed with Tan I and SAM. The reaction products were separated by 15% SDS-PAGE and analyzed by western blotting using antibodies against histone H3K27me3, histone H4, and EZH2.

**Figure S6. Rescue Tan I induced phenotype using Mmp9 and Abcg2 inhibitor. (A-H)** Rescue Tan I induced phenotype by inhibiting Mmp9 and Abcg2d. Fluorescent images of *c-myb* GFP<sup>+</sup> cells in *Tg(c-myb<sup>hyper</sup>:GFP)* transgenic zebrafish embryos. As indicated, Mmp9 inhibitor mmp9-I (C-D) and Abcg2d inhibitor ko143 (E-F) were treated separately or together (G-H) in DMSO or Tan I treated embryos. Scale bars: 200  $\mu$ m

**Table S1.** Sequences of PCR primers used in the study.

Figure S1

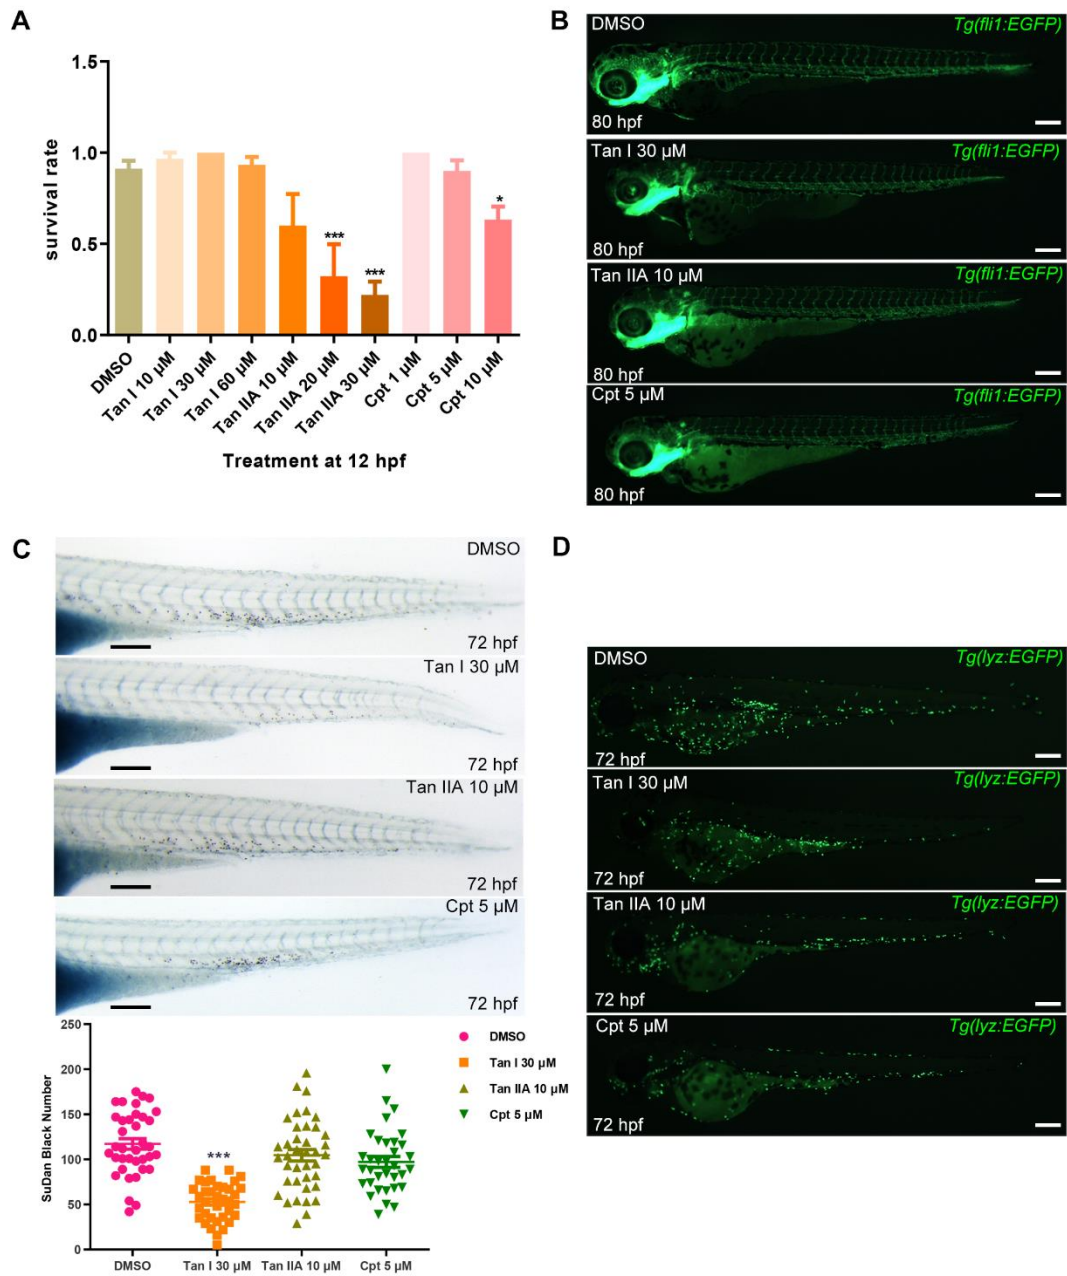

**Figure S2**

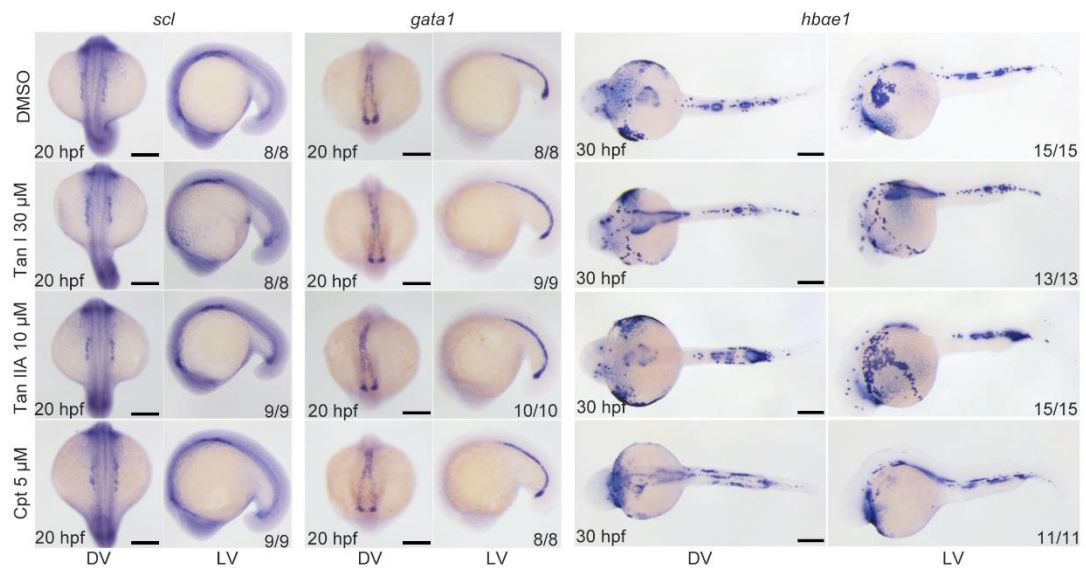

**Figure S3**

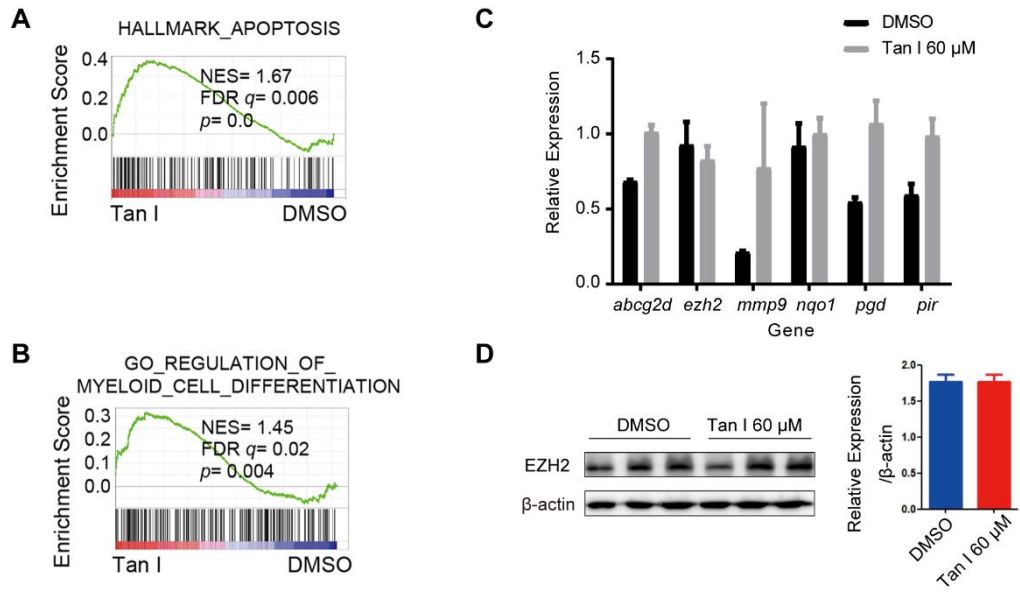

**Figure S4**

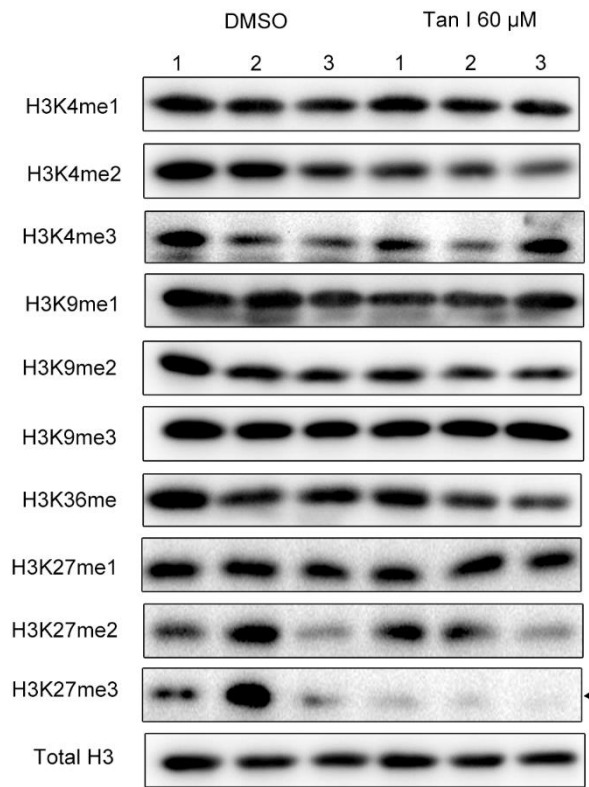

**Figure S5**

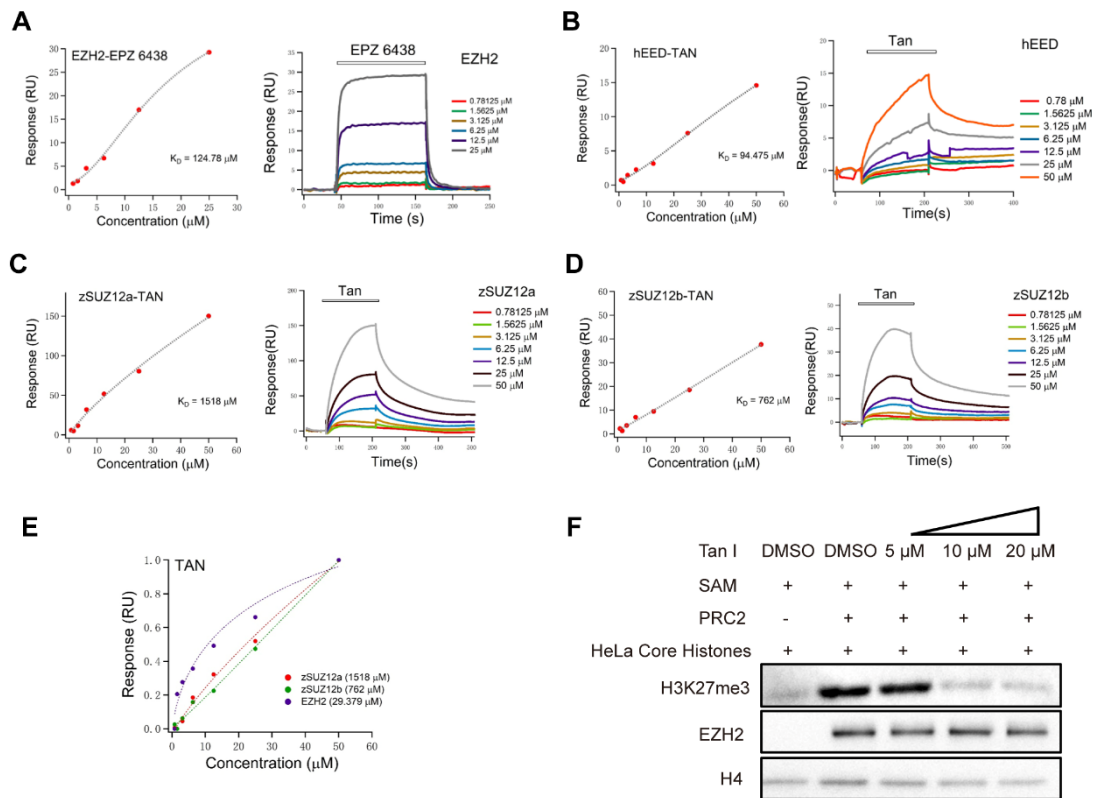

**Figure S6**

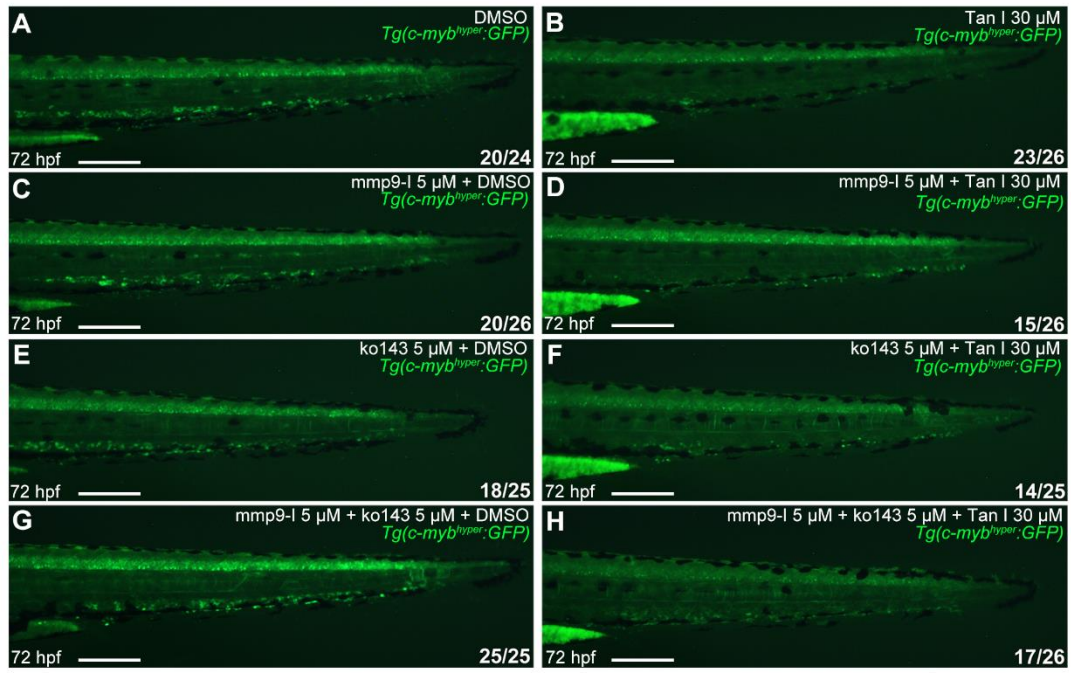

**Table S1**

| Supplementary Table S1: Sequences of PCR primers used in the study. |           |           |                                |                                |
|---------------------------------------------------------------------|-----------|-----------|--------------------------------|--------------------------------|
| Gene                                                                | species   | Test      | Forward                        | Reverse                        |
| <i>MMP9</i>                                                         | Human     | RT-qPCR   | 5'-TGTACCGCTATGGTTACACTCG-3'   | 5'-GGCAGGGACAGTTGCTTCT-3'      |
| <i>ABCG2</i>                                                        | Human     | RT-qPCR   | 5'-ACGAACGGATTAACAGGGTCA-3'    | 5'-CTCCAGACACACCACGGAT-3'      |
| <i>LILRA1</i>                                                       | Human     | RT-qPCR   | 5'-CCAGTGTGTTTCTGATGTCAGC-3'   | 5'-CCGGATGCACCGAGATGAAG-3'     |
| <i>KEL</i>                                                          | Human     | RT-qPCR   | 5'-CGGGTGCTGACAGCTATCC-3'      | 5'-ACACACAGATGTCTCACAGGG-3'    |
| <i>MLXIPL</i>                                                       | Human     | RT-qPCR   | 5'-AGAACCGGCGTATCACACAC-3'     | 5'-GTGCTCACGAGCCCATGAA-3'      |
| <i>FLT3</i>                                                         | Human     | RT-qPCR   | 5'-AGGGACAGTGTACGAAGCTG-3'     | 5'-GCTGTGCTTAAAGACCCAGAG-3'    |
| <i>THBS1</i>                                                        | Human     | RT-qPCR   | 5'-AGACTCCGCATCGAAAGG-3'       | 5'-TCACCACGTTGTTGTCAAGGG-3'    |
| <i>TNFRSF1B</i>                                                     | Human     | RT-qPCR   | 5'-TTCATCCACGGATATTTGCAGG-3'   | 5'-GCTGGGGTAAAGTGTACTGCC-3'    |
| <i>CIQA</i>                                                         | Human     | RT-qPCR   | 5'-TCTGCACTGTACCCGGCTA-3'      | 5'-CCCTGGTAAATGTGACCCTTTT-3'   |
| <i>CIQC</i>                                                         | Human     | RT-qPCR   | 5'-AGGATGGGTACGACGGACTG-3'     | 5'-GTAAGCCGGGTTCTCCCTC-3'      |
| <i>ITGB7</i>                                                        | Human     | RT-qPCR   | 5'-AGAATGGCGGAATCCTCACCT-3'    | 5'-TGAAGTTCAGTTGCTTGACC-3'     |
| <i>GAPDH</i>                                                        | Human     | RT-qPCR   | 5'-GGAGCGAGATCCCTCCAAAAT-3'    | 5'-GGCTGTTGTCATACTTCTCATGG-3'  |
|                                                                     |           |           |                                |                                |
| <i>MMP9</i>                                                         | Human     | ChIP-qPCR | 5'-TTCAGCCCGCACTTATTTTCG-3'    | 5'-CGAGAGGAAGAGGGTTAGCC-3'     |
| <i>ABCG2</i>                                                        | Human     | ChIP-qPCR | 5'-CGCGTCTCTCAATCTCAGTG-3'     | 5'-GTGCTGTGCCACTCAAAG-3'       |
| <i>mmp9-1</i>                                                       | Zebrafish | ChIP-qPCR | 5'-ATTAATCACATCGCCATTTCG-3'    | 5'-AGGGGTTTCCACGAGCTAAT-3'     |
| <i>mmp9-2</i>                                                       | Zebrafish | ChIP-qPCR | 5'-TTGTTGGTGTGCTCGACATT-3'     | 5'-AACACCTCTCCTCTGCTGA-3'      |
| <i>abcg2d-1</i>                                                     | Zebrafish | ChIP-qPCR | 5'-CATGTGCTCGGCTTAACTCC-3'     | 5'-GGCTGTGCATCTTGAACCAA-3'     |
| <i>abcg2d-2</i>                                                     | Zebrafish | ChIP-qPCR | 5'-TGTTGTTCTCCTGCAAACGG-3'     | 5'-GGCAGAACGGTCAAAGATC-3'      |
|                                                                     |           |           |                                |                                |
| <i>mmp9</i>                                                         | Zebrafish | RT-qPCR   | 5'-ACAACCACTGCTTCCACCACAAC-3'  | 5'-TGCGTTCACCATTGCCTGAGATC-3'  |
| <i>abcg2d</i>                                                       | Zebrafish | RT-qPCR   | 5'-GGAGAGAGGAAGAGGACCAGCATC-3' | 5'-TGAGCAGCAGCAGCACAGAATG-3'   |
| <i>ezh2</i>                                                         | Zebrafish | RT-qPCR   | 5'-GAGGCAAACCTCTCGCTGTCAGAC-3' | 5'-GCACCGCTCCAGTCCACATTC-3'    |
| <i>pgd</i>                                                          | Zebrafish | RT-qPCR   | 5'-CAAGGACGCAGACGGCACTAAC-3'   | 5'-GACGAGAGGCATCTGGCAAAGAC-3'  |
| <i>pir</i>                                                          | Zebrafish | RT-qPCR   | 5'-TCGAGGAGTATTGGACGGAGAG-3'   | 5'-CACGGTGAGGATGATCAGGAAAGC-3' |
| <i>nqo1</i>                                                         | Zebrafish | RT-qPCR   | 5'-GAGAGGCTGGGTGGTGTGTTG-3'    | 5'-TGATGTGCTGTGGTAATGCCGTAG-3' |
| <i>β-actin</i>                                                      | Zebrafish | RT-qPCR   | 5'-ATCAGGGTGTGATGGTTGGT-3'     | 5'-CACGCAGCTCGTTGTAGAAG-3'     |
